# Supplementary material for: Introduction of C-alkyl branches to l-iminosugars changes their active site binding orientation
Source: Royal Society of Chemistry journal article supplement (doi:10.1039/d2ob01099b), 2022-01-01

## Supporting information for

# Introduction of C-alkyl branches to L-iminosugars changes their active site binding orientation

Atsushi Kato,<sup>a,\*</sup> Izumi Nakagome,<sup>b</sup> Kosuke Yoshimura,<sup>a</sup> Uta Kanekiyo<sup>a</sup> Mana Kishida<sup>a</sup>, Kenta Shinzawa,<sup>a</sup> Tian-Tian Lu,<sup>c,d</sup> Yi-Xian Li,<sup>c,d</sup> Robert J. Nash,<sup>e</sup> George W. J. Fleet,<sup>f</sup> Nobutada Tanaka,<sup>b</sup> Chu-Yi Yu,<sup>c,d\*</sup>

- a. Department of Hospital Pharmacy, University of Toyama, 2630 Sugitani, Toyama 930-0194, Japan; kato@med.u-toyama.ac.jp.
- b. School of Pharmaceutical Sciences, Kitasato University, Tokyo 108-8641, Japan.
- c. Beijing National Laboratory for Molecular Science (BNLMS), CAS Key Laboratory of Molecular Recognition and Function, Institute of Chemistry, Chinese Academy of Sciences, Beijing 100190, China; E-mail: yucy@iccas.ac.cn.
- d. University of Chinese Academy of Sciences, Beijing 100049, China.
- e. Institute of Biological, Environmental and Rural Sciences / Phytoquest Limited, Plas Gogerddan, Aberystwyth, Ceredigion, SY23 3EB, United Kingdom.
- f. Chemistry Research Laboratory, Department of Chemistry, University of Oxford, Oxford, OX1 3TA, United Kingdom.

### Table of Contents:

|                                                                                              |          |
|----------------------------------------------------------------------------------------------|----------|
| <b>Figure S1 docking score top 10 poses generated by the docking analyses.</b>               | <b>2</b> |
| <b>Figure S2 The binding poses of 5-C-alkyl-L-ido-DNJs extracted from the MD trajectory.</b> | <b>3</b> |
| <b>NMR spectral data</b>                                                                     | <b>4</b> |

Figure S1 docking score top 10 poses generated by the docking analyses.

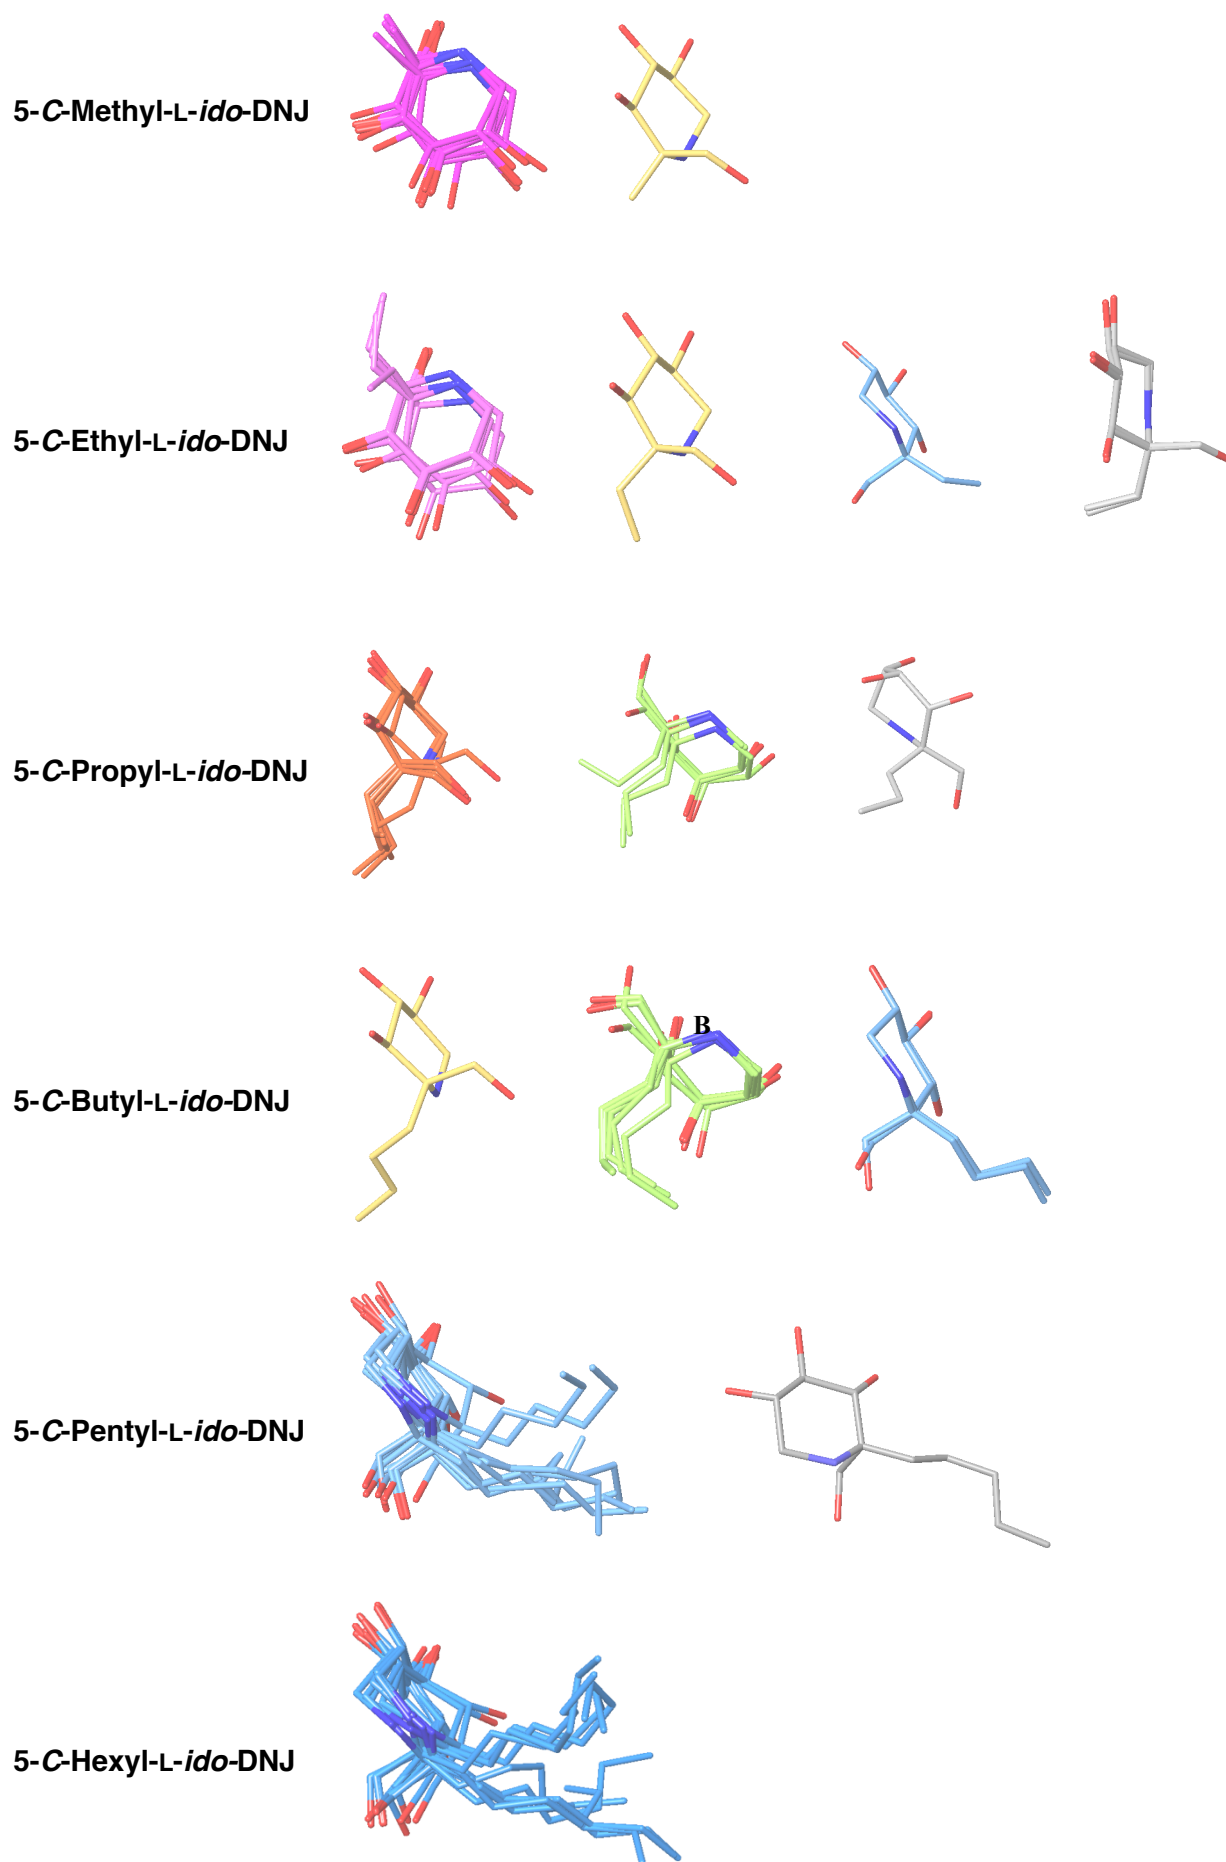

Figure S2 The binding poses of 5-C-alkyl-L-ido-DNJ's extracted from the MD trajectory.

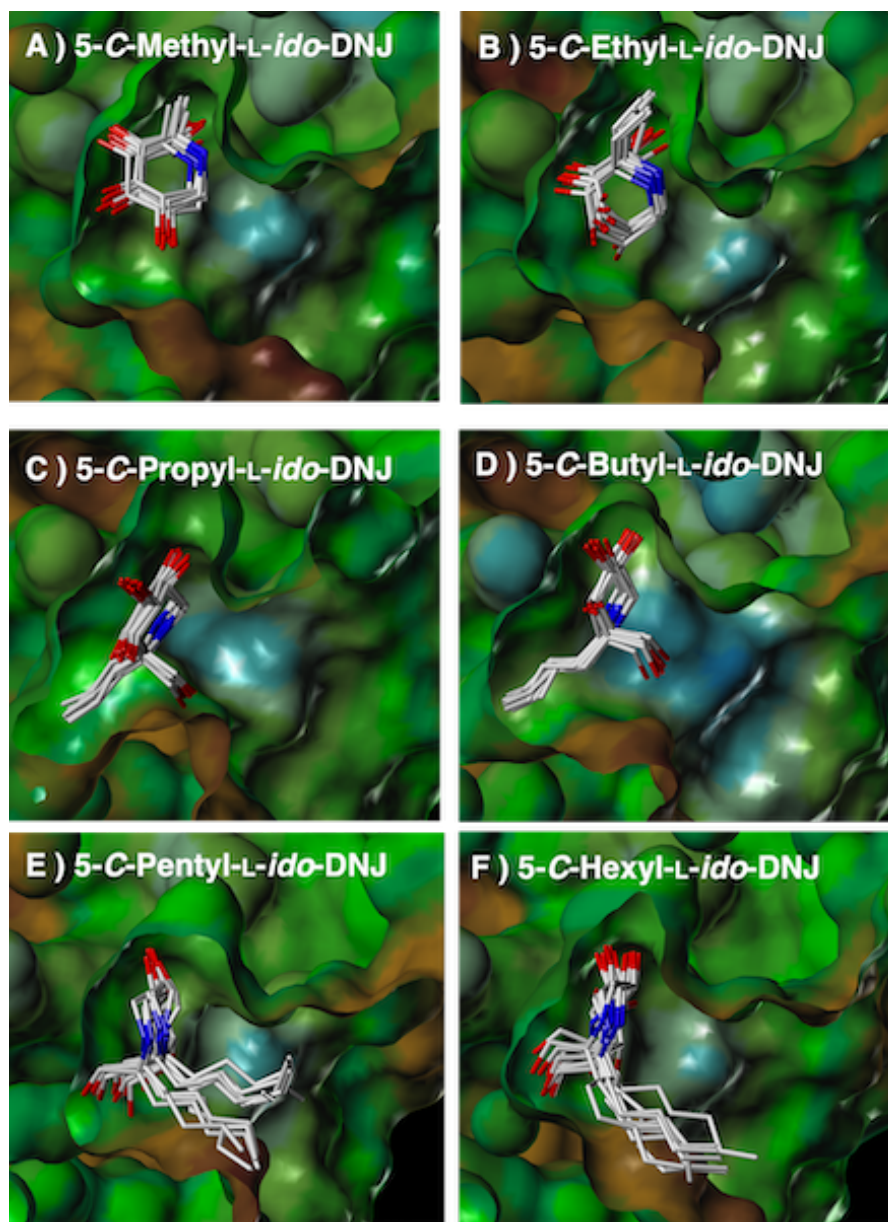

The molecular surfaces of GAA are rendered by lipophilic potential.

The 10 binding poses sampled from the MD trajectory are shown.

# Compound 2

768a

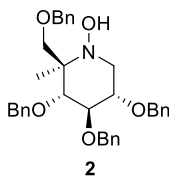

```

Current Data Parameters
NAME      400M
EXPNO    73
PROCNO   1

F2 - Acquisition Parameters
Date_    20180709
Time     2.12 h
INSTRUM  spect
PROBHD   5 mm PABBO BB/
PULPROG  zg30
TD       32768
SOLVENT  CDCl3
NS       16
DS       4
SWH      8012.820 Hz
FIDRES   0.489064 Hz
AQ       2.0447233 sec
RG       39.52
DM       62.400 usec
DE       6.50 usec
TE       298.4 K
DL       2.00000000 sec
TDO      1
SFO1     400.2424716 MHz
NUC1     1H
P1       14.80 usec
PLM1     12.00000000 W

F2 - Processing parameters
SI       65536
SF       400.2400880 MHz
WDW      EM
SSB      0
LB       0.30 Hz
GB       0
PC       1.00
    
```

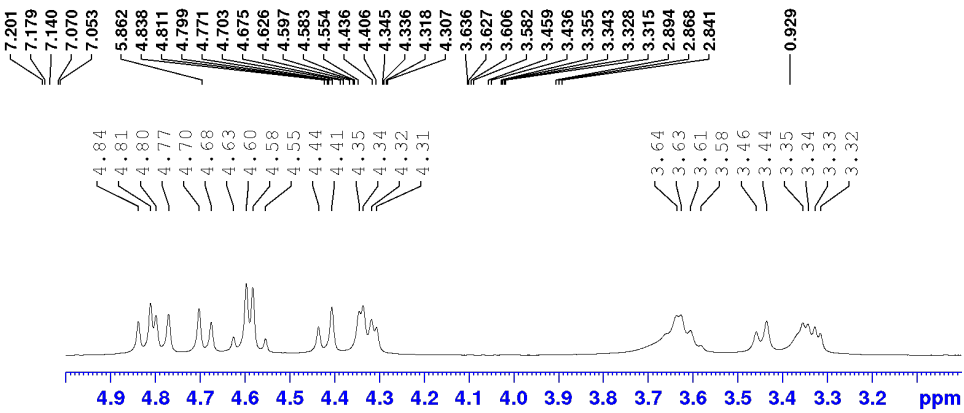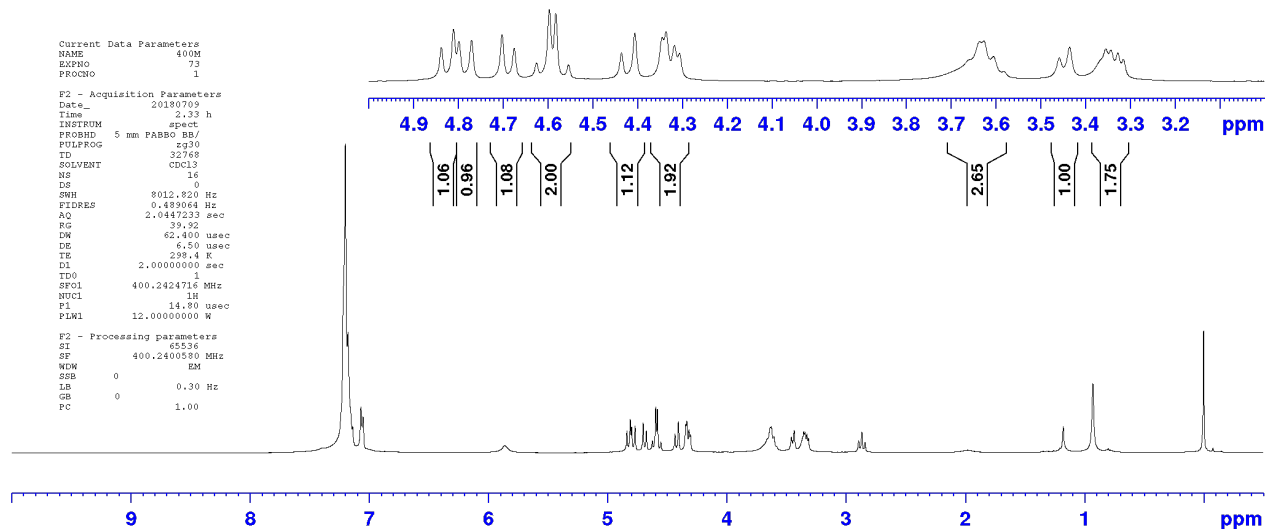

768a

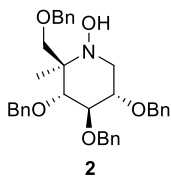

```

Current Data Parameters
NAME      400M
EXPNO    74
PROCNO   1

F2 - Acquisition Parameters
Date_    20180709
Time     1.52 h
INSTRUM  spect
PROBHD   5 mm PABBO BB/
PULPROG  zg30
TD       65536
SOLVENT  CDCl3
NS       1024
DS       4
SWH      24038.461 Hz
FIDRES   0.733594 Hz
AQ       1.363448 sec
RG       206.233
DM       20.800 usec
DE       6.50 usec
TE       299.6 K
DL       2.00000000 sec
SLL      0.03000000 sec
DELTA    4.89999998 sec
TDO      1
SFO1     100.6254916 MHz
NUC1     13C
P1       10.00 usec
PLM1     54.00000000 W
SFO2     400.2416010 MHz
NUC2     1H
CPDPRG2  waltz16
PCPDW    90.00 usec
PLM2     12.00000000 W
PLM3     0.34800000 W
PLM13    0.28090999 W

F2 - Processing parameters
SI       32768
SF       100.6400372 MHz
WDW      EM
SSB      0
LB       1.00 Hz
GB       0
PC       1.40
    
```

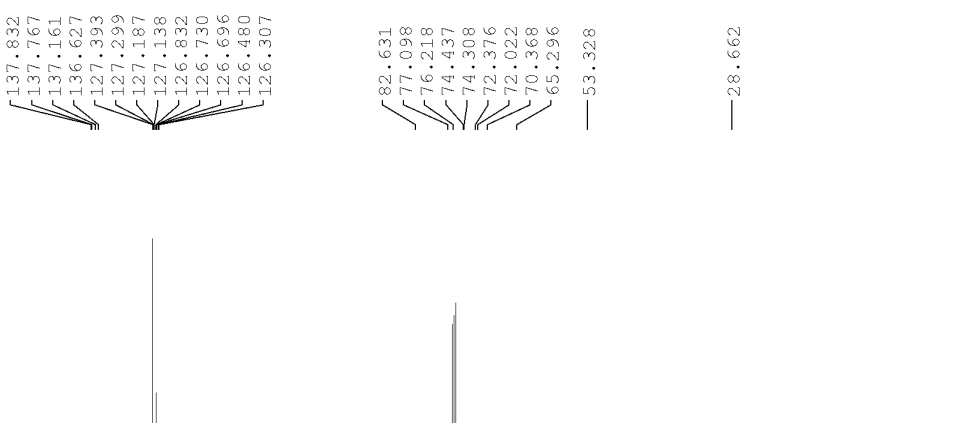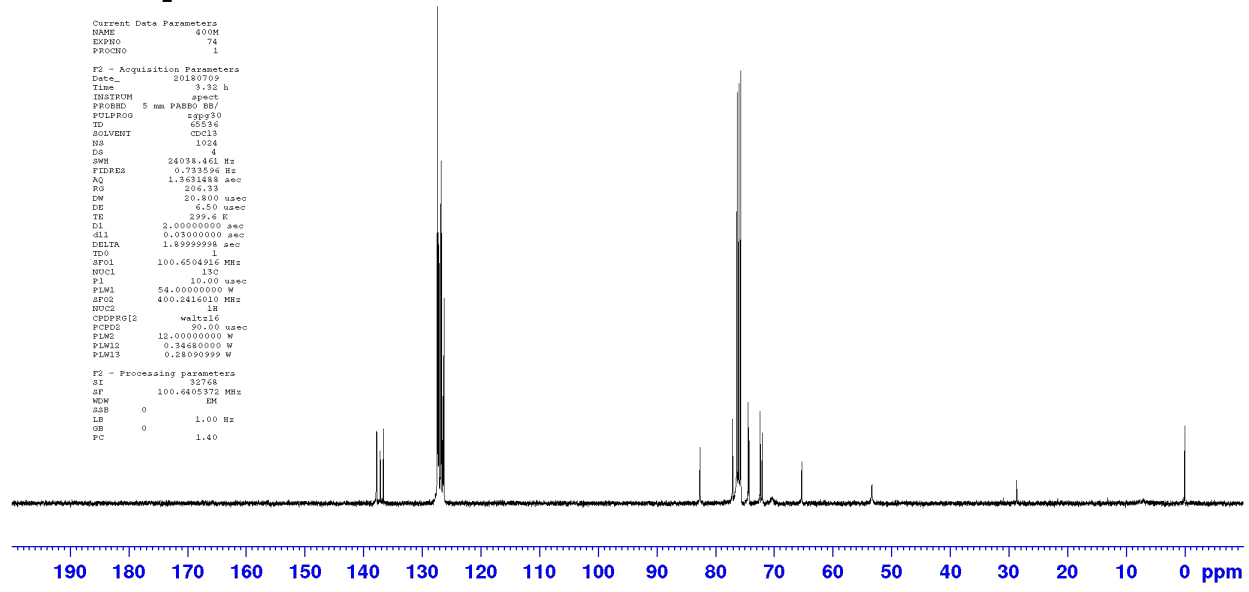

# Compound 3

768b

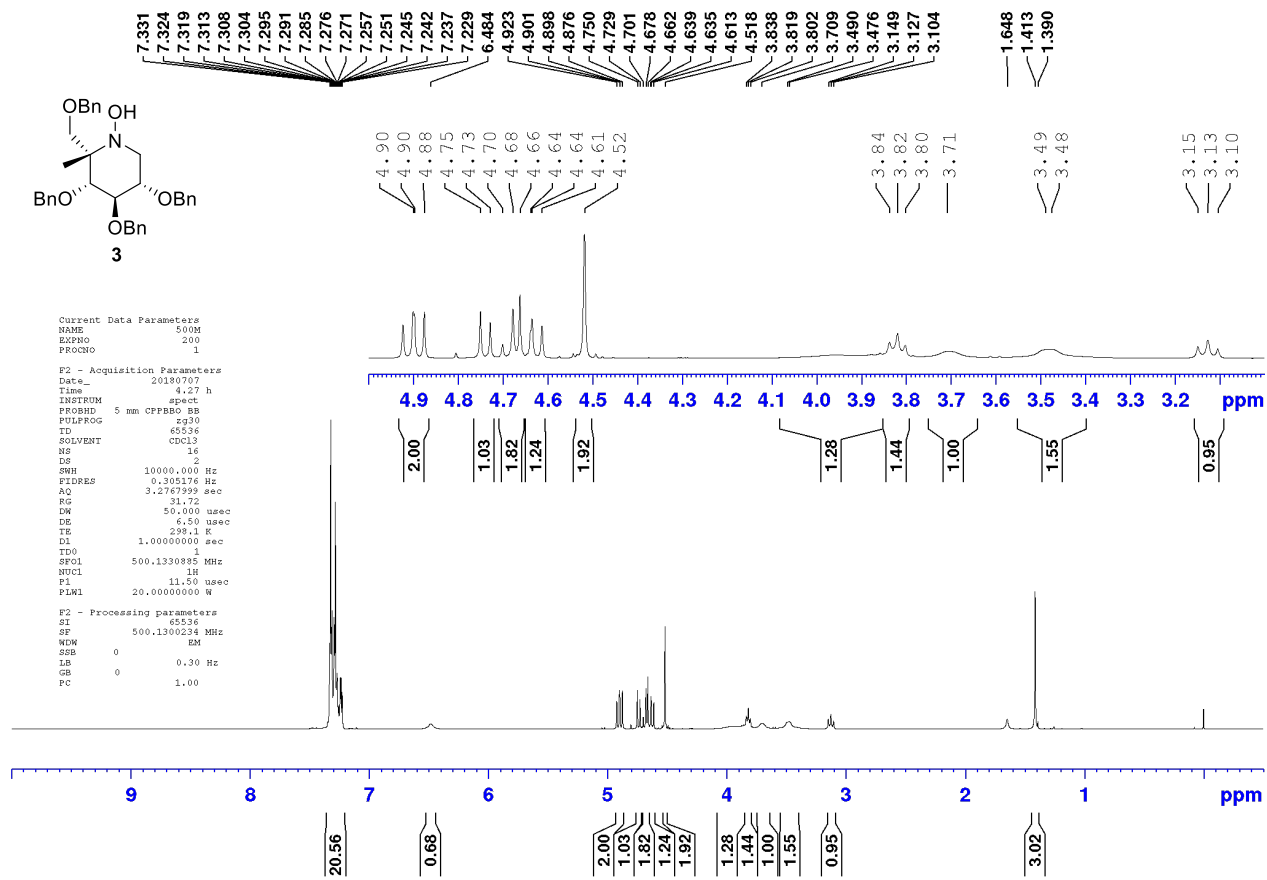

768b

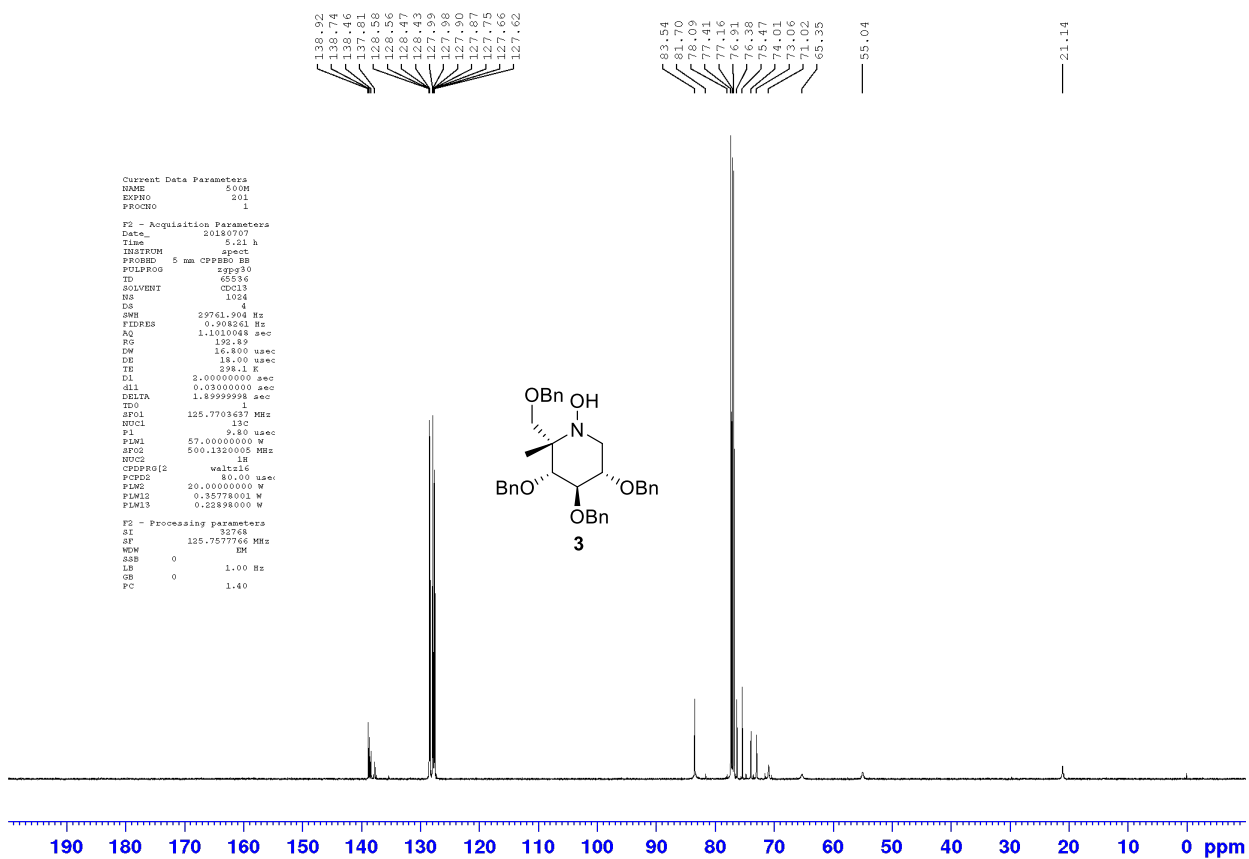

# Compound 4

778

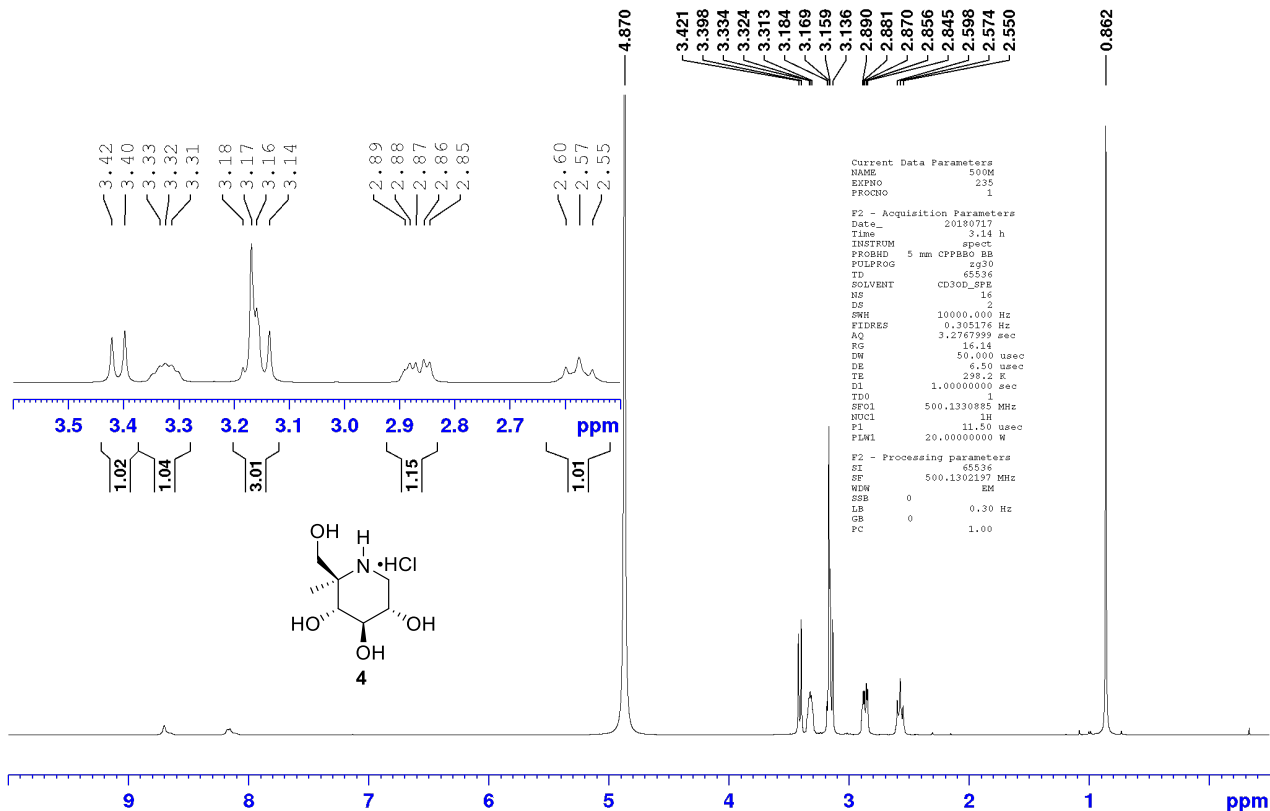

778

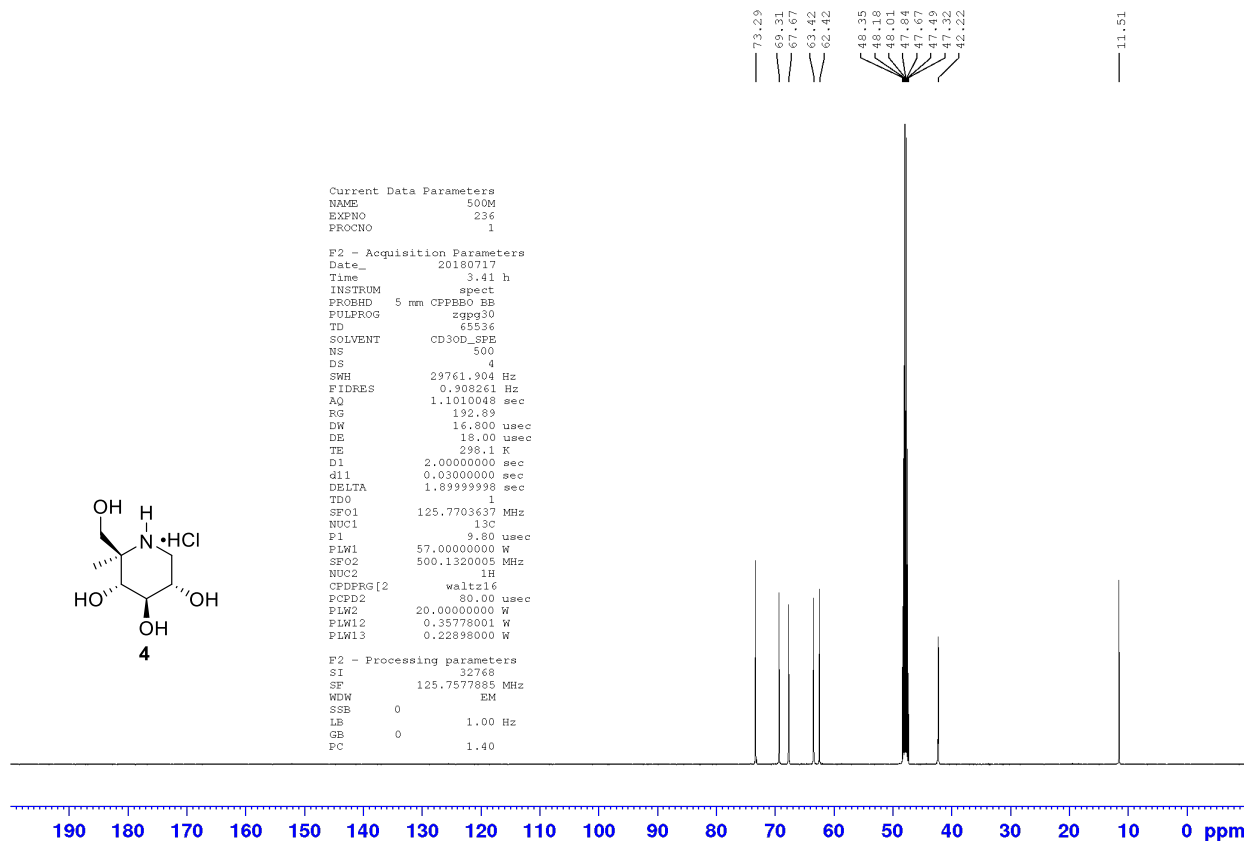

# Compound 5

779

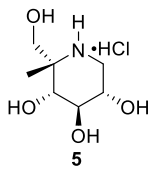

```

Current Data Parameters
NAME          500M
EXPNO         239
PROCNO        1

F2 - Acquisition Parameters
Date_         20180717
Time          4.00 h
INSTRUM       spect
PROBHD        5 mm CPPBBO BB
PULPROG       zgpg30
TD            65536
SOLVENT       CD3OD_SFE
NS            16
DS            4
SWH           10000.000 Hz
FIDRES        0.305176 Hz
AQ            3.2767999 sec
RG            31.72
DW            50.000 usec
DE            6.50 usec
TE            298.2 K
D1            1.00000000 sec
TDO           1
SFO1          500.1330885 MHz
NUC1          1H
P1            11.50 usec
PLW1          20.00000000 W

F2 - Processing parameters
SI            65536
SF            500.1301143 MHz
WDW           EM
SSB           0
LB            0.30 Hz
GB            0
PC            1.00
    
```

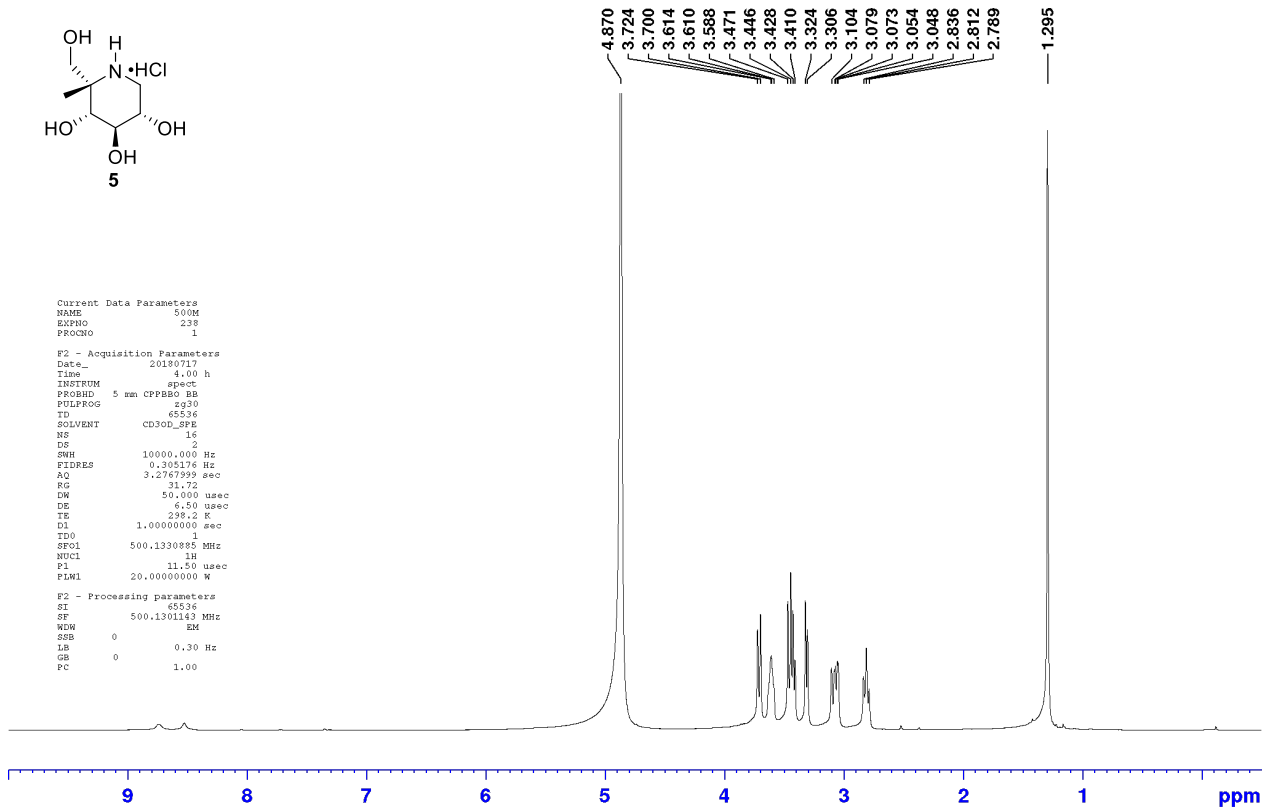

779

```

Current Data Parameters
NAME          500M
EXPNO         239
PROCNO        1

F2 - Acquisition Parameters
Date_         20180717
Time          4.27 h
INSTRUM       spect
PROBHD        5 mm CPPBBO BB
PULPROG       zgpg30
TD            65536
SOLVENT       CD3OD_SFE
NS            500
DS            4
SWH           29761.904 Hz
FIDRES        0.908261 Hz
AQ            1.1010048 sec
RG            192.89
DW            16.800 usec
DE            18.00 usec
TE            298.1 K
D1            2.00000000 sec
d11           0.03000000 sec
DELTA         1.89999998 sec
TDO           1
SFO1          125.7703637 MHz
NUC1          13C
P1            9.80 usec
PLW1          57.00000000 W
SFO2          500.1320005 MHz
NUC2          1H
CPDPRG[2]    waltz16
PCPD2         80.00 usec
PLW2          20.00000000 W
PLW12         0.35778001 W
PLW13         0.22898000 W

F2 - Processing parameters
SI            32768
SF            125.7577885 MHz
WDW           EM
SSB           0
LB            1.00 Hz
GB            0
PC            1.40
    
```

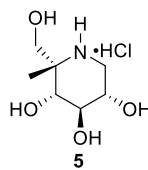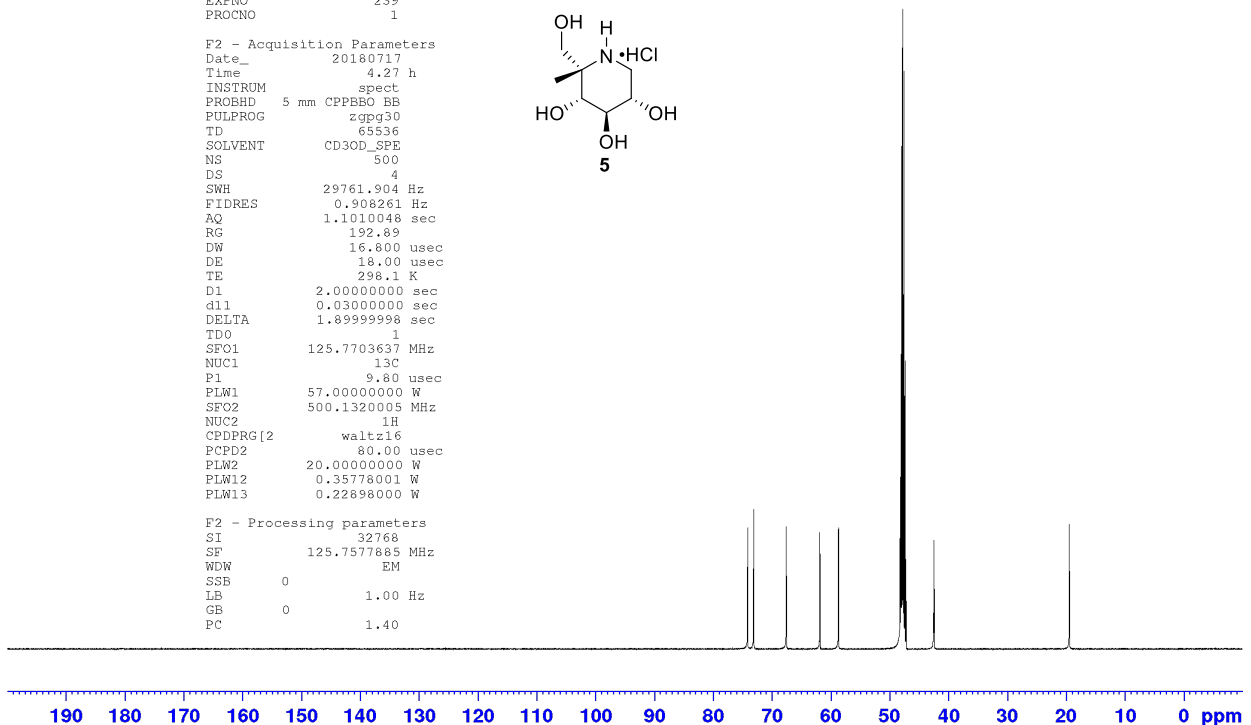

Supplement: d2ob01099b1.pdf [file d2ob01099b1.pdf]
